1 **Title: Factors associated with osteoarthritis in elderly people in Shanghai: A cross-**  
2 **sectional study**

3 Xueyao Liang<sup>1†</sup>, Bo Zheng<sup>1†</sup>, Xiyao Cao<sup>4†</sup>, Shuangfei Xu<sup>1,2,3</sup>, Qiongmei Zhang<sup>4</sup>, Qing  
4 Fei<sup>4</sup>, Nanqian Lu<sup>4</sup>, Kai Zhang<sup>4</sup>, Qingchun Liu<sup>4</sup>, Ying Han<sup>4</sup>, Xiaoyin Hu<sup>4</sup>, Weibing  
5 Wang<sup>1,2,3</sup>, Bing Liu<sup>4\*</sup>, Mengfan Li<sup>4\*</sup>, Ying Wu<sup>4\*</sup>, Yefeng Zhao<sup>4\*</sup>

6

7

8

9

10 1 Department of Epidemiology, School of Public Health, Fudan University, Shanghai  
11 200032, China

12 2 School of Public Health, Shanghai Institute of Infectious Disease and Biosecurity,  
13 Fudan University, Shanghai 20032, China

14 3 Key Laboratory of Public Health Safety of Ministry of Education, Fudan University,  
15 Shanghai 200032, China

16 4 Shanghai Putuo Liqun Hospital, 910 Taopu Road, Shanghai 200333, China

17

18 † These authors contributed equally to this work.

19 \* Corresponding authors:

20 Dr. Yefeng Zhao

21 Orthopedics Department, Shanghai Putuo Liqun Hospital, 910 Taopu Road, Shanghai 200333,  
22 China(e-mail: [zhaoyefeng2002@live.com](mailto:zhaoyefeng2002@live.com)).

23 Dr. Ying Wu

24 Medical Department, Shanghai Putuo Liqun Hospital, 910 Taopu Road, Shanghai 200333, China(e-  
25 mail: [15618717232@163.com](mailto:15618717232@163.com))

26 Dr. Mengfan Li

27 Medical Department, Shanghai Putuo Liqun Hospital, 910 Taopu Road, Shanghai 200333, China(e-  
28 mail: [yihuang99@163.com](mailto:yihuang99@163.com))

29 Dr. Bing Liu

30 Medical Department, Shanghai Putuo Liqun Hospital, 910 Taopu Road, Shanghai 200333, China(e-  
31 mail: [anebal@126.com](mailto:anebal@126.com))

32

33

34 **NOTE: This preprint reports new research that has not been certified by peer review and should not be used to guide clinical practice.**

35 **Title: Factors associated with osteoarthritis in elderly people in Shanghai: A cross-**  
36 **sectional study**

37

38

39 **ABSTRACT**

40 **Background:** Osteoarthritis (OA) is a degenerative disease of mostly' middle-aged and  
41 elderly people that contributes a high burden of disease in China and worldwide.  
42 However, many putative risk factors associated with OA in elderly populations remain  
43 substantially unclear.

44 **Methods:** In our cross-sectional study, 2177 residents of the Putuo District of Shanghai  
45 aged 40 years and above were recruited to complete a questionnaire that queried basic  
46 health information and assessed the prevalence of OA. A non-conditional and an ordinal  
47 logistic regression model was used to analyze the associations between putative risk  
48 factors and the severity of confirmed OA.

49 **Results:** Among 2099 eligible participants, the average age was 65.21 years( 41.4%  
50 were male), and 551 self-reported OA [prevalence = 26.25% (24.13, 28.51)]. The  
51 prevalence of knee OA were the most common (23.11% , 21.12 to 25.23). OA was  
52 associated with age  $\geq$  60 years (aOR = 1.56; 1.18, 2.07), overweight BMI (24~27.9  
53 kg/m<sup>2</sup>) (1.30; 1.02 to 1.65), female sex (1.66; 1.30 to 2.12), unmarried status (1.41;  
54 1.03 to 1.90), a family history of OA (6.23; 4.17 to 9.38), two or more comorbidities  
55 (2.18; 1.52 to 3.11), and prior injury to any joint (12.02; 4.86 to 31.22).

56 **Conclusions:** Old age, Female sex, family history and multiple comorbidities were  
57 significant contributors to promote the severity of OA. Appropriate prevention and  
58 treatment strategies must be developed to reduce the burden of the disease.

59

60 **Keywords:** OA; BMI; WOMAC; Risk factor; Severity

61

62

## 63 1 INTRODUCTION

64 OA is the most common degenerative disease of joints [1] caused by fibrosis,  
65 chapping, ulceration, and attrition of articular cartilage, with clinical manifestations of  
66 joint pain, tenderness, limitation of movement and articulation, occasional effusion, and  
67 local inflammation of varying degrees[2]. As a commonly irreversible disease of  
68 middle-aged and elderly (aged 40 years old and above)[3], OA is part of the aging  
69 process, which will seriously affect the patient's quality of life. The final disability rate  
70 of this disease is 53%, and advanced knee OA can lead to the need for joint-replacement  
71 surgery[1, 4, 5]. OA is recognized as a major public health challenge; it affects an  
72 estimated 32 million people in the US and more than 240 million people worldwide[2].  
73 Globally, the age-standardized point prevalence, annual incidence rate, and age-  
74 standard YLD rate of OA were increasing from 1990 to 2017[6].

75 OA similarly contributes to a high burden of disease in China[7]; it is estimated  
76 that around 26.1 million individuals in China had OA in 1990, and this number rose to  
77 61.2 million in 2017[8]. The prevalence of OA in China varies according to  
78 sociodemographic, economic, and geographic factors. Xu Tang's research showed that  
79 the North and East regions of China had the lowest prevalence of symptomatic knee  
80 OA (5.4% and 5.5%, respectively), followed by the Northeast (7.0%), South-Central  
81 (7.8%), and Northwest (10.8%) regions, with the highest prevalence seen in the  
82 Southwest region (13.7%)[9]. According to the Shanghai Bureau of Statistics[10], in  
83 2021, the city's registered population aged 60 years and over was about 5,324,100;  
84 approximately 366,000 of these individuals were in Putuo District, accounting for 40.99%  
85 of the total population in the district. OA is a major public health concern that results  
86 in decreased quality of life among middle-aged and older adults[11]. Therefore,  
87 epidemiologic studies aimed at identifying risk factors that contribute to OA in China  
88 are needed, as are explorations of prevention and treatment strategies appropriate for  
89 older individuals.

90 Previous studies found that OA is related to many factors, such as age, gender, and  
91 region[9, 12, 13]. OA prevalence and YLDs are higher in females than in males, and

92 the YLD rate increases with age[8]. While a multitude of factors contribute to the  
93 development of OA, many putative risk factors associated with OA in elderly  
94 populations remain substantially unclear, except for age, sex, and BMI. Additionally,  
95 the associations between putative risk factors and OA severity are uncertain. Given  
96 society's responsibility to protect the elderly population, it is essential that researchers  
97 identify the risk factors associated with musculoskeletal disease in later life. This study  
98 aimed to investigate the prevalence of OA in a community of elderly people in the  
99 Putuo District of Shanghai, and to determine putative risk factors associated with  
100 confirmed OA and the severity thereof.

## 101 **2 Methods**

### 102 *Study design and setting*

103 This study was cross-sectional and involved distributing a survey to collect  
104 information on factors potentially associated with OA, as well as demographics,  
105 lifestyle, past medical history, general health, occupational history, and participation in  
106 sports and physical activity. Our trained investigator introduced the purpose of the study  
107 and provided information to participants on filling out the questionnaire . Our survey  
108 was carried out between Oct 2020 and Mar 2021 in the Putuo District of Shanghai.  
109 Implied consent to participate was obtained from all participants completing the study  
110 questionnaire. The study was approved by the Ethics Committee of the Shanghai Putuo  
111 Liqun Hospital (No. RT-201911).

### 112 *Sampling and eligibility criteria*

113 The recruitment of eligible individuals was performed using multi-stage stratified  
114 sampling. Lists of hospitals were obtained with the help of workers from Putuo District,  
115 and the Liqun Hospital was chosen. Sufficient clinical departments were sampled from  
116 the list of all clinical departments in the hospital, and eligible patients of the chosen  
117 departments were contacted in sequence. A trained investigator familiar with the  
118 purpose of the study provided information on filling out the questionnaire.

119 A signed informed consent form was obtained from all participants included in the  
120 study. All included participants had lived in the Putuo District for at least 6 months  
121 prior to being enrolled in the study. Inclusion criteria for participants were aged 40

122 years and older. The exclusion criteria for this study were: 1) the presence of a severe  
123 mental or neurological disorder; 2) the presence of rheumatoid arthritis, reactive  
124 arthritis, ankylosing spondylitis, or another secondary joint disease; and 3) data missing  
125 on the a priori confounders of age, sex, and BMI.

## 126 ***Survey***

127 The questionnaire consisted of four sections: demographic information, health  
128 status, living/working environment and dietary conditions and physical examination.  
129 The Western Ontario and McMaster Universities OA Index (WOMAC index, Chinese  
130 version)[14] was additional part that was given only to those participants with  
131 confirmed OA (self-reported had been diagnosed OA by X-rays or labs tests).  
132 Demographic information, living/working environment and dietary condition referred  
133 to (as examples) the respondent's age, sex, height, weight, residence, educational level,  
134 working posture, and per capita annual household income information. The obtained  
135 health status information comprised information on medication history, physical  
136 exercise, comorbidities, joint pain, trauma history, surgery history, OA history of  
137 family members, etc. The WOMAC is a self-assessment questionnaire comprising 24  
138 items on three subscales: pain (5 items), stiffness (2 items), and physical function (17  
139 items)[15]. The overall WOMAC score (index) is determined by summing the scores  
140 across the three dimensions; the score can range from 0 to 240[15]: <80 indicates mild  
141 OA, 80-120 is moderate OA, and >120 represents severe OA. The Chinese version of  
142 WOMAC has strong internal consistency (Cronbach's alpha = 0.840.96) and acceptable  
143 test-retest reliability[16]. For the WOMAC index, our study achieved a Cronbach's  
144 alpha score of 0.986. In this study, symptomatic OA was adopted as the diagnostic  
145 criteria, which refers to the presence of recurring joint pain and other symptoms,  
146 including joint pain, stiffness and limited mobility, in the past month on the basis of  
147 imaging OA

## 148 ***Statistical analysis***

149 The collected data from questionnaires were entered with Epidata version 3.4 for  
150 data management and to be proofread. Mean (95% CI) or median/interquartile ranges  
151 were used to describe the distribution of continuous variables, and the frequency and

152 component ratio were used to describe the characteristics of categorical variables. The  
153 Mann-Whitney U test was used to compare means and the Chi-square test was used to  
154 compare rates.

155 Univariate logistic regression was used to analyze crude associations between each  
156 independent variable and confirmed OA, which was reported as a crude odds ratio (cOR)  
157 with 95% confidence. All factors were entered separately into Adjusted model 1 and  
158 adjusted for the a priori confounders of age, sex, and BMI. The obtained Adjusted  
159 model 2 was then fitted to the a priori confounders plus any significant factors/variables  
160 identified in Adjusted model 1. Adjusted model 2 involved the stepwise multivariate  
161 analysis of any significant factors/variables identified in Adjusted 1 model plus the a  
162 priori confounders. Meanwhile, we used univariate ordinal logistic regression to  
163 determine the univariate associations between significant factors identified for  
164 confirmed OA and the severity of OA. All significant factors ( $P < 0.05$ ) were included  
165 in our multivariate analysis. P values and 95% CIs were used to assess statistical  
166 significance in all models. We conducted all analyses in R.4.1.1 software (Foundation  
167 for Statistical Computing, Vienna, Austria. ISBN 3-900051-07-0, URL [https://www.r-](https://www.r-project.org/)  
168 [project.org/](https://www.r-project.org/)). Statistical significance was set at a two-side p value  $< 0.05$ .

### 169 **3 Results**

#### 170 *Demographic, lifestyle, and health characteristics of participants*

171 A total of 2177 questionnaires were returned between Oct 2020 and Mar 2021.  
172 (details of excluded participants are available in online supplemental Figure 1). Of those  
173 included in the analysis( $n = 2099$ ), the mean age was 65.21 years (95% CI: 64.79,  
174 65.63), 58.6% were female (1230/2099), and the average BMI were 24.85(24.42-25.27).  
175 The average cumulative working years was 29.03 years (28.65, 29.41), and 33.4%  
176 (702/2099) of respondents walked for their daily travel. The percentage reporting  
177 married status was significantly higher among male participants (88.8%) than female  
178 participants (85.4%) ( $P < 0.001$ ). Of the participants, 82.9% (1020/1230) of females  
179 took stairs during their daily or work life, while only 77.6% (674/869) of males reported  
180 habitual stair use. A family history of OA was reported by 4.8% (42/869) of male  
181 participants and 8.5% (105/1230) of female participants; thus, significantly more

182 female participants had a family history of OA compared to male participants ( $P <$   
183 0.001). Among all participants, 971 (46.3%) had self-reported comorbidities and 655  
184 (31.2%) were receiving long-term any medical treatment (see Table 1).

### 185 ***Prevalence of OA and OA-related pain***

186 Of participants, 551 were identified as having confirmed OA [prevalence = 26.25%  
187 (95% CI: 24.13, 28.51)]; more women (70.4%) than men (29.6%). Knee OA had the  
188 highest prevalence (23.11%) followed by interphalangeal OA (2.38%), hip OA (1.95%),  
189 and other-region OA (1.00%). For the prevalence of recurrent joint pain in the prior  
190 month, 20.68% (18.80, 22.69), 7.05% (5.98, 8.26), 6.34% (5.33, 7.48), and 4.67% (3.81,  
191 5.66) of participants reported such pain in the knee joint, interphalangeal joint, hip joint,  
192 and other joints, respectively. Among those reporting pain of any joint in the prior  
193 month, 73.2% (595/813) were female and 26.8% (218/813) were male (see Figure 2).

### 194 ***Factors associated with OA***

195 In our ultimate stepwise multi-variable (Adjusted model 2) analysis of all  
196 significant factors/variables from Adjusted model 1 (Supplementary Table 2) plus the  
197 a priori confounders revealed that OA was associated with age  $\geq 60$  (aOR = 1.56; 1.18,  
198 2.07,  $P < 0.001$ ), overweight BMI (24~27.9 kg/m<sup>2</sup>) (aOR = 1.30; 1.02, 1.65,  $P = 0.040$ ),  
199 female sex (aOR = 1.66; 1.30, 2.12,  $P < 0.001$ ), unmarried status, divorced or widowed  
200 (aOR = 1.41; 1.03, 1.90,  $P = 0.030$ ), a family history of OA (aOR = 6.23; 4.17, 9.38,  $P$   
201  $< 0.001$ ), two or more comorbidities (aOR = 2.18; 1.52, 3.11,  $P < 0.001$ ), and prior  
202 injury of any joint (aOR = 12.02; 4.86, 31.22,  $P < 0.001$ ). Similarly, we identified  
203 potential protective factors [e.g., professional and technical work (aOR = 0.51; 0.29,  
204 0.87,  $P = 0.010$ ), ambidextrous (aOR = 0.47; 0.23, 0.97,  $P = 0.040$ ), use of bicycle for  
205 daily travel (aOR = 0.61; 0.44, 0.83,  $P < 0.001$ ), use of public transportation or other  
206 mode for daily travel (aOR = 0.59; 0.45, 0.77,  $P < 0.001$ )] in our ultimate stepwise  
207 multi-variable analysis (see Figure 3).

### 208 ***Factors associated with the severity of OA***

209 Of participants with confirmed OA, the overall response rate to the WOMAC  
210 questionnaire was 71.9% (396/551); of these respondents, 367 scored as mild OA  
211 (92.7%), 11 as moderate OA (2.8%), and 18 as severe OA (4.5%). In our univariate

212 ordinal logistic regression, the use of a bicycle for daily travel (cOR = 0.12; 95% CI:  
213 0.02, 0.95) and non-long-term medical treatment tended to be associated with less  
214 severe OA compared to walking for daily travel and long-term medical treatment (cOR  
215 = 4.00; 1.57, 10.19), respectively; however, these differences did not reach the level of  
216 significance ( $P_{\text{by bicycle}} = 0.234$ ;  $P_{\text{long-term medical treatment}} = 0.626$ ) in multivariate analysis.  
217 Unmarried or other (divorced/widowed) status participants had significantly more  
218 severe OA than those of Married (cOR = 4.97, 2.28, 10.84; aOR = 3.75, 1.53, 9.19,  $P$   
219 = 0.004). Participants reporting a family history of OA (cOR = 3.09, 1.30, 7.34; aOR =  
220 4.73, 1.73, 12.91,  $P = 0.002$ ) tended to have significantly more severe OA. Our results  
221 also showed that an increasing number of comorbidities contributed to increasing the  
222 severity of OA, with significant contributions observed for participants with two or  
223 more comorbidities (cOR = 7.91, 2.30, 27.16; aOR = 8.53, 1.75, 41.54,  $P = 0.008$ ) (see  
224 Table 2).

#### 225 **4 Discussion**

226 This study investigated the prevalence and factors associated with OA at any joint  
227 among those aged 40 and older. The knee OA was the most common among all region  
228 OA. The present study found that OA was associated with age  $\geq 60$ , overweight BMI  
229 (24~27.9 kg/m<sup>2</sup>), female sex, married status, a family history of OA, two or more  
230 comorbidities, and prior injury of any joint. Marriage status a family history of OA, and  
231 two or more comorbidities were found to be associated with OA severity.

232 Consistent with previous reports[17, 18], age and sex were significantly associated  
233 with OA in this study. Recent epidemiological studies have shown that the lack of  
234 estrogen after menopause may play a role in the pathogenesis of OA in elderly women,  
235 and that many women are more prone to OA after menopause[13, 19]. This suggests  
236 that sex hormones may contribute to the difference in OA between men and women.  
237 OA was also reported to be significantly affected by obesity[20], which is commonly  
238 believed to affect joints through biomechanical loading and metabolic inflammatory  
239 pathways[21]. An apparent dose-response relationship between obesity and OA was  
240 observed in this research. The adjusted OR for obese BMI ( $\geq 28$  kg/m<sup>2</sup>) did not reach  
241 the level of significance, but this may reflect sparse-data bias due to the small number



242 of participants with obese BMI. A correlation between joint hypermobility and OA has  
243 been reported in community populations[22, 23]; hypermobility is thought to exert  
244 greater biomechanical stresses on articular cartilage, potentially increasing the risk of  
245 OA. Consistent with this, we found that the ambidextrous tended to be protected from  
246 OA, as were individuals who mainly used bicycle/public transportation. We found that  
247 having a professional or technical occupation (aOR = 0.51; 0.29, 0.87, P = 0.010) was  
248 associated with a significantly lower prevalence of OA, whereas the prevalence peaked  
249 for non-farm-household industrial workers. These findings were similar to those of a  
250 population-based study indicating that physically demanding work is a major risk factor  
251 for OA [24]. Previous reports posited that joint injury (meniscal injuries, dislocations,  
252 fractures[25] and ACL tears[26]) may be a major risk factor for the development of  
253 knee OA[27, 28]. Our study confirmed that there was a significant association between  
254 prior joint injury and OA. This may reflect that direct trauma to the tissue can disrupt  
255 normal joint kinematics and cause altered load distribution within the joint[12].

256 Previous research found that OA has a significant genetic component[29]. The  
257 heritable component of OA is reported to be approximately 50%[30] and polygenic[31].  
258 Our results showed that a family history of OA made significant contributions to both  
259 the presence and severity of OA. Eirik Weldingh reported that a family history  
260 contributes to OA and that maternal OA consistently increases the risk of offspring OA  
261 across different OA locations and severities[32]. Similar to the findings of a previous  
262 report[12], those suffering from two or more comorbidities (i.e., diabetes, cancer, lung  
263 disease, stroke, heart disease) were more likely to report OA, especially more severe  
264 OA. The relationship between OA and comorbidities, such as coronary heart disease  
265 (CHD), is not yet completely understood. It may partly reflect shared underlying  
266 disease mechanisms or risk factors and the influenced of shared treatments or those  
267 with effects on both diseases, such as NSAIDs[33]. There is a paucity of research on  
268 the relationship between marital status and OA, especially the severity of OA. A study  
269 in Taiwan revealed that higher disability could be explained by unmarried status among  
270 arthritic older patients[34], and another found that married patients had better overall  
271 outcomes after total knee arthroplasty [35]. Our present results suggest that married

272 participants were less likely to have OA overall or severe OA than those unmarried or  
273 other, especially a milder OA. Being married has been generally found to confer  
274 benefits for one's mental and physical health because it provides steady and reliable  
275 companionship, emotional intimacy, sexual partnership, and a buffer against ongoing  
276 stress[36, 37]. Notably, one-fifth of people with OA experience symptoms of  
277 depression and anxiety[38], almost half do not receive any mental healthcare  
278 support[39], and depression is related to worse pain, higher functional disability, and  
279 higher rates of mortality[40]. Thus, avoiding depression and anxiety may be an  
280 especially important domain to consider in the elderly population.

281 There are limitations to our analysis. First, reporting bias may be present if  
282 participants did not accurately recall their information (history of injury/OA, family  
283 history of OA, etc.). Second, our study was only descriptive and thus carries the  
284 possibility of residual confounding. In the future cohort, studies could be used to better  
285 demonstrate that the identified causes preceded the studied outcome. Although we  
286 stratified for major factors such as sex and BMI adjustment, this cross-sectional analysis  
287 did not exhaustively address other potential unmeasured confounders associated with  
288 OA, such as history of taking antihypertensive and anti-inflammatory drugs, which  
289 were not included in the questionnaire at the study-design stage. In the future,  
290 inflammatory factors such as C-reactive protein can be included to further analyze the  
291 mediating factors and the association between risk factors and OA. Third, despite our  
292 strenuous efforts to achieve a high response rate to the WOMAC questionnaire among  
293 participants with confirmed OA, the overall response rate to the WOMAC  
294 questionnaire was 71.9% (396/551), meaning that there may have been recruitment bias.

## 295 **5 Conclusions**

296 We found that confirmed OA in an elderly population was associated with a  
297 number of factors, including age  $\geq$  60, overweight, female sex, married status,  
298 professional and technical work, ambidextrous, not walking for daily travel, a family  
299 history of OA, two or more comorbidities, and prior injury of any joint. In addition,  
300 marriage status, a family history of OA, and comorbidity had significant contributions  
301 to the severity of OA. Appropriate prevention and treatment strategies, predominantly

302 those targeting women and individuals who are older, unmarried, and have a family  
303 history of OA, should be developed to reduce the burden of the disease.

304

### 305 **Acknowledgments**

306 We gratefully acknowledge all of the health care workers in Liqun hospital for  
307 Collection of questionnaires in this study.

### 308 **Authors' contributions**

309 XL and BZ contributed equally. YFZ, YW and WBW contributed equally to the  
310 correspondence work. XL, SFX and BZ analysed the data and drafted the manuscript.  
311 WBW and YFZ conducted critical revisions of the manuscript. All authors read and  
312 approved the final manuscript.

### 313 **Funding**

314 This study was supported by the Scientific research projects of Shanghai Health  
315 Commission, (Grant No. 201940490), Shanghai Putuo District Health System Science  
316 and Technology Innovation Project, (Grant No. ptkwws202321), and Shanghai Putuo  
317 District Health System and Clinical Characteristic Disease Construction Project ,  
318 (Grant No. tszb-2019-01).

### 319 **Availability of data and materials**

320 The data presented in this study are available on request from the corresponding author  
321 Yefeng Zhao(e-mail:zhaoyefeng2002@live.com.)and Dr.Weibing Wang (e-mail:  
322 ww@fudan.edu.cn).

### 323 **Ethics approval and consent to participate**

324 The study was approved by the Ethics Committee of the Shanghai Putuo Liqun Hospital  
325 (No. RT-201911).

### 326 **Consent for publication**

327 Not applicable.

### 328 **Competing interests**

329 The authors declare that they have no known competing financial interests or personal  
330 relationships that could influence the work reported in this paper.

### 331 **Author details**

332 <sup>1</sup>Department of Epidemiology, School of Public Health, Fudan University, Shanghai  
333 200032, China. <sup>2</sup>School of Public Health, Shanghai Institute of Infectious Disease and

334 Biosecurity, Fudan University, Shanghai 20032, China.<sup>3</sup>Key Laboratory of Public

335 Health Safety of Ministry of Education, Fudan University, Shanghai 200032, China.

336 <sup>4</sup> Shanghai Putuo Liqun Hospital, 910 Taopu Road, Shanghai 200333, China

337

338

339

340

341

342

343

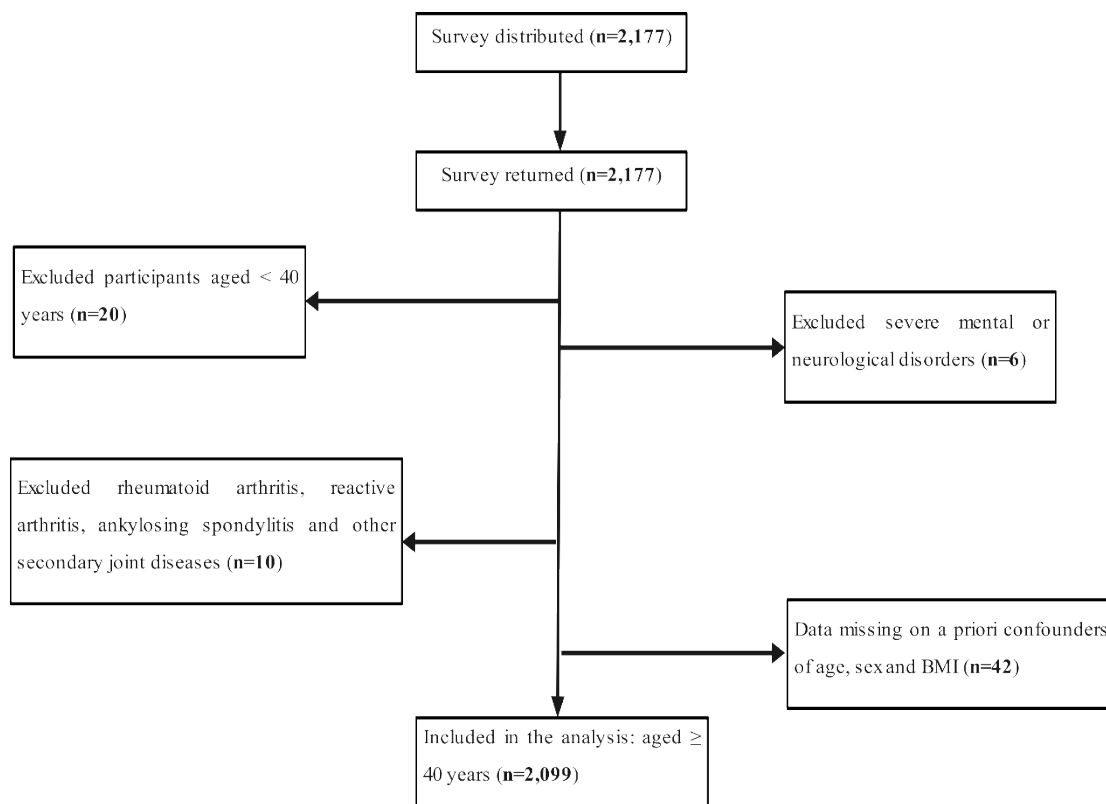

344

345 **Figure 1. Flow chart depicting the number of participants included in this study.**

346 **Table 1: Anthropometry, Lifestyle, and Health Factors.**

| Characteristics                             | All                     | Male                    | Female                  | P Value           |
|---------------------------------------------|-------------------------|-------------------------|-------------------------|-------------------|
|                                             | (n = 2099)              | (n = 869)               | (n = 1230)              |                   |
|                                             | Mean (95% CI)           | Mean (95% CI)           | Mean (95% CI)           |                   |
| Age, years                                  | 65.21 (64.79 ,65.63)    | 65.69 (65.05, 66.34)    | 64.87 (64.32, 65.42)    | 0.057             |
| Height, cm                                  | 163.98 (163.67 ,164.29) | 169.92 (169.52, 170.32) | 159.78 (159.51, 160.05) | <b>&lt; 0.001</b> |
| Weight, kg                                  | 71.23 (69.59, 72.87)    | 63.75 (62.25, 65.24)    | 66.85 (65.73 ,67.97)    | <b>&lt; 0.001</b> |
| Body mass index, kg/m <sup>2</sup>          | 24.85 (24.42 ,25.27)    | 24.66 (24.09, 25.23)    | 24.98 (24.38, 25.58)    | 0.453             |
| Duration of working career, years           | 29.03 (28.65 ,29.41)    | 32.02 (31.36 ,32.67)    | 26.9 (26.49 ,27.31)     | <b>&lt; 0.001</b> |
| Ethnic Han, %                               | 1879 (89.5)             | 796 (91.6)              | 1083 (88.0)             | <b>0.011</b>      |
| Married, %                                  | 1823 (86.9)             | 772 (88.8)              | 1051 (85.4)             | <b>0.028</b>      |
| Junior high school and below, %             | 889 (42.4)              | 354 (40.7)              | 535 (43.5)              | 0.224             |
| Household income per capita <5000 CNY, %    | 1314 (62.6)             | 534 (61.4)              | 780 (63.4)              | 0.088             |
| Medical insurance for urban workers, %      | 1541 (73.4)             | 606 (69.7)              | 935 (76.0)              | <b>0.002</b>      |
| 0-3 hours/per week for physical exercise, % | 1108 (52.8)             | 468 (53.9)              | 640 (52.0)              | 0.626             |
| Both sitting or standing in work, %         | 759 (36.2)              | 297 (34.2)              | 462 (37.6)              | 0.186             |
| Ambidextrous, %                             | 207 (9.9)               | 74 (8.5)                | 133 (10.8)              | 0.119             |
| Walk for daily travel, %                    | 702 (33.4)              | 193 (22.2)              | 509 (41.4)              | <b>&lt;0.001</b>  |
| Taking stairs for daily life or work, %     | 1694 (80.7)             | 674 (77.6)              | 1020 (82.9)             | <b>0.003</b>      |
| Balanced diet, %                            | 1477 (70.4)             | 590 (67.9)              | 887 (72.1)              | 0.082             |
| Family history of OA, %                     | 147 (7.0)               | 42 (4.8)                | 105 (8.5)               | <b>0.004</b>      |
| Any history of surgery, %                   | 98 (4.7)                | 32 (3.7)                | 66 (5.4)                | 0.183             |
| Any long-term medical treatment*, %         | 655 (31.2)              | 250 (28.8)              | 405 (32.9)              | 0.128             |
| Any current disease, %                      | 971 (46.3)              | 390 (44.9)              | 581 (47.2)              | 0.307             |

347 Data are presented as means with 95% confidence intervals (95% CIs) or as proportions  
 348 (%). The P values represent comparison between male and female participants using  
 349 unpaired t-test or Chi-square analysis. Statistically significant differences are bolded.

350 \*Chronic or intermittent use over 6 months.

351

352

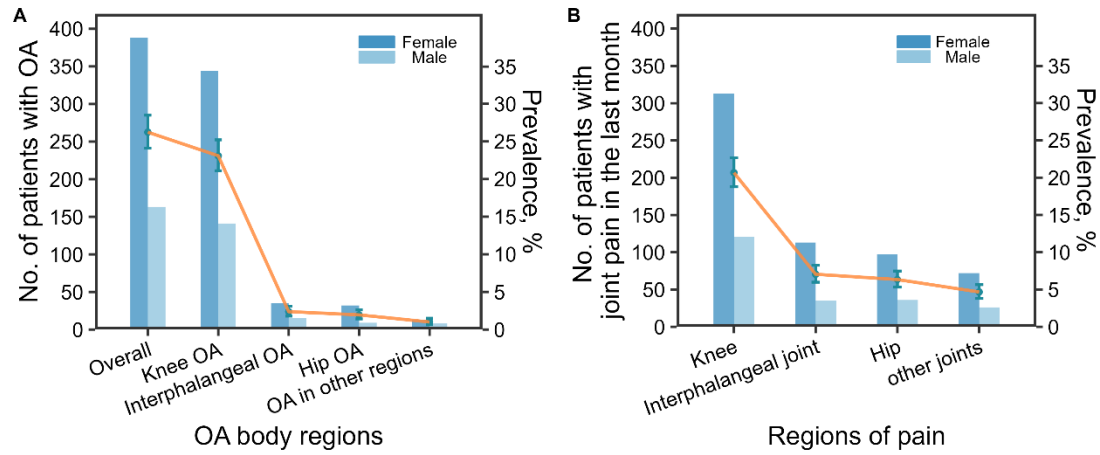

353

354 **Figure 2. Prevalence of clinically confirmed OA (A) and recurrent joint pain in**  
355 **the last month (B) among different body regions.**

356

357

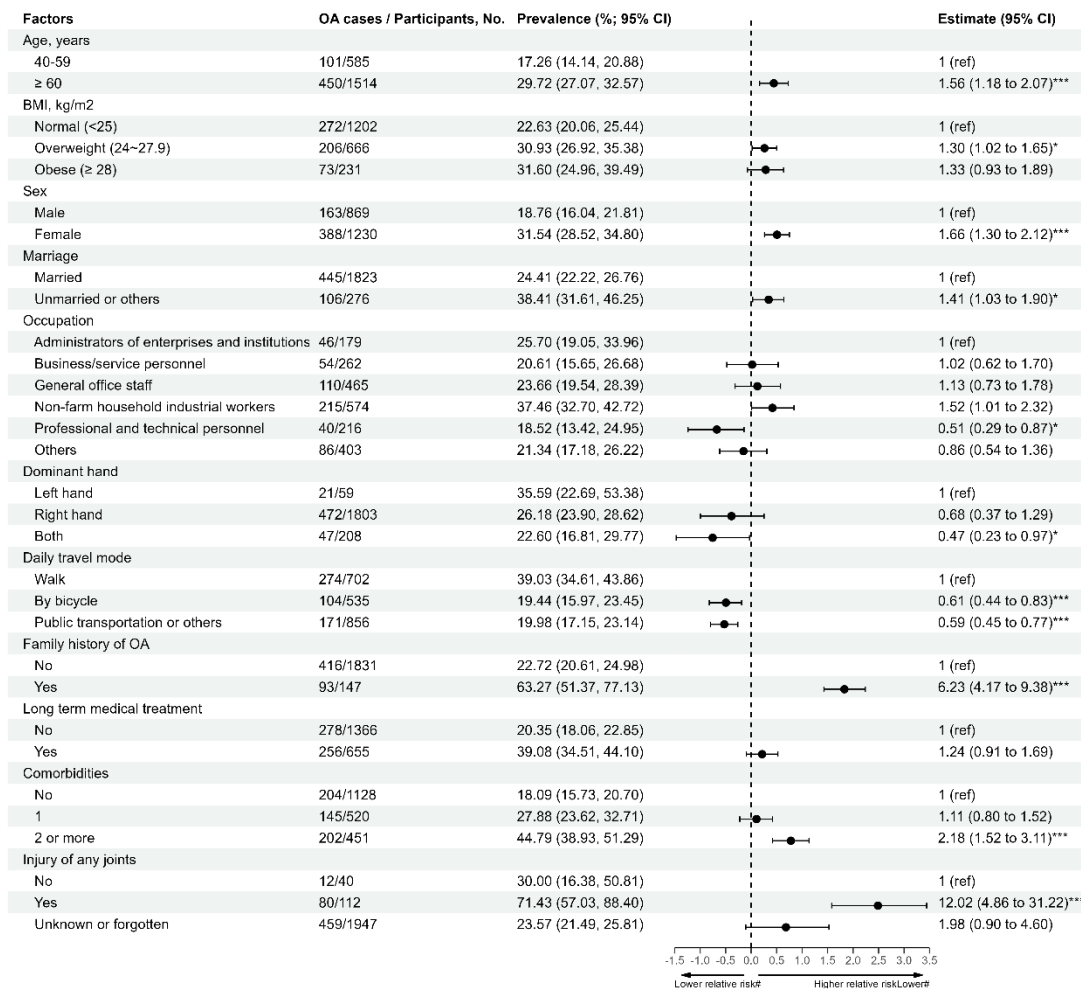

358

359 **Figure 3. Demographic, lifestyle, and biomechanical factors of OA.** Stepwise  
 360 multivariable logistic regression analysis of significant factors/variables identified in  
 361 Adjusted model 1 (Supplementary Table 2) plus a priori confounders of age, sex, and  
 362 BMI. The error bar and dots represent the adjusted relative risk of OA with a  
 363 logarithmic scale. The error bars indicate 95% CIs. The vertical dotted line at 0.0 is a  
 364 reference for the x-axis. \*P < 0.05, \*\*P < 0.01, \*\*\*P < 0.001; # logarithmic scale.  
 365



366

367 **Table 2. Analysis of the association of factors with OA severity.**

| Characteristics                    | Severity of OA (No, %)                         |            |            | OR (95% Confidence Interval, CI) |                       | P value              |       |
|------------------------------------|------------------------------------------------|------------|------------|----------------------------------|-----------------------|----------------------|-------|
|                                    | Mild                                           | Moderate   | Severe     | Crude                            | Adjusted              |                      |       |
| <b>Age, years</b>                  | 40-59                                          | 72 (19.6)  | 0 (0.0)    | 2 (11.1)                         | 1 (ref)               |                      |       |
|                                    | ≥ 60                                           | 295 (80.4) | 11 (100.0) | 16 (88.9)                        | 3.25 (0.76, 13.99)    |                      |       |
| <b>BMI, kg/m<sup>2</sup></b>       | Normal (<25)                                   | 186 (50.7) | 5 (45.5)   | 12 (66.7)                        | 1 (ref)               |                      |       |
|                                    | Overweight (24–27.9)                           | 135 (36.8) | 4 (36.4)   | 3 (16.7)                         | 0.56 (0.23, 1.38)     |                      |       |
|                                    | Obese (≥ 28)                                   | 46 (12.5)  | 2 (18.2)   | 3 (16.7)                         | 1.18 (0.41, 3.35)     |                      |       |
| <b>Sex</b>                         | Male                                           | 109 (29.7) | 4 (36.4)   | 6 (33.3)                         | 1 (ref)               |                      |       |
|                                    | Female                                         | 258 (70.3) | 7 (63.6)   | 12 (66.7)                        | 0.81 (0.36, 1.79)     |                      |       |
| <b>Marriage</b>                    | Married                                        | 310 (84.5) | 5 (45.5)   | 10 (55.6)                        | 1 (ref)               | 1 (ref)              |       |
|                                    | Unmarried or others                            | 57 (15.5)  | 6 (54.5)   | 8 (44.4)                         | 4.97 (2.28, 10.84)*** | 3.75 (1.53, 9.19)**  | 0.004 |
| <b>Occupation</b>                  | Administrators of enterprises and institutions | 34 (9.3)   | 2 (18.2)   | 1 (5.6)                          | 1 (ref)               |                      |       |
|                                    | Business/service personnel                     | 29 (7.9)   | 0 (0.0)    | 2 (11.1)                         | 0.82 (0.13, 5.26)     |                      |       |
|                                    | General office staff                           | 73 (19.9)  | 4 (36.4)   | 1 (5.6)                          | 0.77 (0.18, 3.42)     |                      |       |
|                                    | Non-farm household industrial workers          | 149 (40.6) | 3 (27.3)   | 11 (61.1)                        | 1.11 (0.30, 4.06)     |                      |       |
|                                    | Professional and technical personnel           | 38 (10.4)  | 1 (9.1)    | 2 (11.1)                         | 0.92 (0.17, 4.86)     |                      |       |
|                                    | Others                                         | 44 (12.0)  | 1 (9.1)    | 1 (5.6)                          | 0.53 (0.08, 3.32)     |                      |       |
| <b>Ambidextrous</b>                | No                                             | 322 (87.7) | 10 (90.9)  | 16 (88.9)                        | 1 (ref)               |                      |       |
|                                    | Yes                                            | 41 (11.2)  | 1 (9.1)    | 2 (11.1)                         | 0.91 (0.26, 3.14)     |                      |       |
| <b>Daily travel mode</b>           | Walk                                           | 190 (51.8) | 9 (81.8)   | 11 (61.1)                        | 1 (ref)               | 1 (ref)              |       |
|                                    | By bicycle                                     | 76 (20.7)  | 1 (9.1)    | 0 (0.0)                          | 0.12 (0.02, 0.95)*    | 0.28 (0.03, 2.29)    | 0.234 |
|                                    | Public transportation or others                | 99 (27.0)  | 1 (9.1)    | 7 (38.9)                         | 0.79 (0.34, 1.86)     | 1.63 (0.58, 4.56)    | 0.352 |
| <b>Family history of OA</b>        | No                                             | 295 (80.4) | 6 (54.5)   | 10 (55.6)                        | 1 (ref)               | 1 (ref)              |       |
|                                    | Yes                                            | 54 (14.7)  | 3 (27.3)   | 6 (33.3)                         | 3.09 (1.30, 7.34)*    | 4.73 (1.73, 12.91)** | 0.002 |
| <b>Long term medical treatment</b> | No                                             | 192 (52.3) | 4 (36.4)   | 2 (11.1)                         | 1 (ref)               | 1 (ref)              |       |
|                                    | Yes                                            | 162 (44.1) | 7 (63.6)   | 13 (72.2)                        | 4.00 (1.57, 10.19)**  | 1.34 (0.41, 4.32)    | 0.626 |
| <b>Comorbidities</b>               | No                                             | 136 (37.1) | 1 (9.1)    | 2 (11.1)                         | 1 (ref)               | 1 (ref)              |       |
|                                    | 1                                              | 111 (30.2) | 2 (18.2)   | 3 (16.7)                         | 2.04 (0.48, 8.72)     | 1.84 (0.37, 9.23)    | 0.458 |
|                                    | 2 or more                                      | 120 (32.7) | 8 (72.7)   | 13 (72.2)                        | 7.91 (2.30, 27.16)**  | 8.53 (1.75, 41.54)** | 0.008 |

368 Crude: Univariate ordinal logistic regression analysis was used to analyze factors that  
 369 might affect OA severity; \*P < 0.05, \*\*P < 0.01, \*\*\*P < 0.001. Adjusted: Multivariable  
 370 ordinal logistic regression analysis was performed including the significant  
 371 factors/variables identified in the univariate ordinal logistic regression; injury of any  
 372 joint was excluded because this was positive for most participants.

373

374

375

376 **References**

377

- 378 1. Martel-Pelletier J, Barr AJ, Cicuttini FM, Conaghan PG, Cooper C, Goldring MB, et al.  
379 Osteoarthritis. *Nat Rev Dis Primers*. 2016;2:16072. Epub 2016/10/14. doi:  
380 10.1038/nrdp.2016.72. PubMed PMID: 27734845.
- 381 2. Yue L, Berman J. What Is Osteoarthritis? *Jama*. 2022;327(13):1300. Epub 2022/04/06. doi:  
382 10.1001/jama.2022.1980. PubMed PMID: 35380583.
- 383 3. Sun X, Zhen X, Hu X, Li Y, Gu S, Gu Y, et al. Osteoarthritis in the Middle-Aged and Elderly  
384 in China: Prevalence and Influencing Factors. *Int J Environ Res Public Health*. 2019;16(23).  
385 Epub 2019/11/30. doi: 10.3390/ijerph16234701. PubMed PMID: 31779104; PubMed Central  
386 PMCID: PMCPMC6926632.
- 387 4. Hunter DJ, Bierma-Zeinstra S. Osteoarthritis. *Lancet*. 2019;393(10182):1745-59. Epub  
388 2019/04/30. doi: 10.1016/s0140-6736(19)30417-9. PubMed PMID: 31034380.
- 389 5. Chen AT, Bronsther CI, Stanley EE, Paltiel AD, Sullivan JK, Collins JE, et al. The Value of  
390 Total Knee Replacement in Patients With Knee Osteoarthritis and a Body Mass Index of 40  
391 kg/m(2) or Greater : A Cost-Effectiveness Analysis. *Ann Intern Med*. 2021;174(6):747-57. Epub  
392 2021/03/23. doi: 10.7326/m20-4722. PubMed PMID: 33750190; PubMed Central PMCID:  
393 PMCPMC8288249.
- 394 6. Safiri S, Kolahi AA, Smith E, Hill C, Bettampadi D, Mansournia MA, et al. Global, regional  
395 and national burden of osteoarthritis 1990-2017: a systematic analysis of the Global Burden of  
396 Disease Study 2017. *Ann Rheum Dis*. 2020;79(6):819-28. Epub 2020/05/14. doi:  
397 10.1136/annrheumdis-2019-216515. PubMed PMID: 32398285.
- 398 7. Zhang Z, Huang C, Jiang Q, Zheng Y, Liu Y, Liu S, et al. Guidelines for the diagnosis and

- 399 treatment of osteoarthritis in China (2019 edition). *Ann Transl Med.* 2020;8(19):1213. Epub  
400 2020/11/13. doi: 10.21037/atm-20-4665. PubMed PMID: 33178745; PubMed Central PMCID:  
401 PMC7607097.
- 402 8. Long H, Zeng X, Liu Q, Wang H, Vos T, Hou Y, et al. Burden of osteoarthritis in China,  
403 1990–2017: findings from the Global Burden of Disease Study 2017. *The Lancet Rheumatology.*  
404 2020;2(3):e164-e72. doi: [https://doi.org/10.1016/S2665-9913\(19\)30145-6](https://doi.org/10.1016/S2665-9913(19)30145-6).
- 405 9. Tang X, Wang S, Zhan S, Niu J, Tao K, Zhang Y, et al. The Prevalence of Symptomatic  
406 Knee Osteoarthritis in China: Results From the China Health and Retirement Longitudinal Study.  
407 *Arthritis Rheumatol.* 2016;68(3):648-53. Epub 2015/10/17. doi: 10.1002/art.39465. PubMed  
408 PMID: 26474054.
- 409 10. Statistics SBo. *ShangHai Statistical Yearbook2021*.
- 410 11. Kim HS, Park HM, Kim H, Lee HS, Son DH, Lee YJ. Association Between the Severity of  
411 Periodontitis and Osteoarthritis in Middle-Aged and Older Patients With Type 2 Diabetes  
412 Mellitus: A Nationwide Population-Based Study. *Arthritis Care Res (Hoboken).* 2022;74(3):403-  
413 9. Epub 2020/10/13. doi: 10.1002/acr.24484. PubMed PMID: 33044789.
- 414 12. Cooper DJ, Scammell BE, Batt ME, Palmer D. Factors associated with pain and  
415 osteoarthritis at the hip and knee in Great Britain's Olympians: a cross-sectional study. *British*  
416 *Journal of Sports Medicine.* 2018;52(17):1101. doi: 10.1136/bjsports-2017-098315.
- 417 13. Prieto-Alhambra D, Judge A, Javaid MK, Cooper C, Diez-Perez A, Arden NK. Incidence  
418 and risk factors for clinically diagnosed knee, hip and hand osteoarthritis: influences of age,  
419 gender and osteoarthritis affecting other joints. *Ann Rheum Dis.* 2014;73(9):1659-64. Epub  
420 2013/06/08. doi: 10.1136/annrheumdis-2013-203355. PubMed PMID: 23744977; PubMed

- 421 Central PMCID: PMCPMC3875433.
- 422 14. Bellamy N, Buchanan WW. A preliminary evaluation of the dimensionality and clinical  
423 importance of pain and disability in osteoarthritis of the hip and knee. *Clin Rheumatol.*  
424 1986;5(2):231-41. Epub 1986/06/01. doi: 10.1007/bf02032362. PubMed PMID: 3731718.
- 425 15. Woolacott NF, Corbett MS, Rice SJ. The use and reporting of WOMAC in the assessment  
426 of the benefit of physical therapies for the pain of osteoarthritis of the knee: findings from a  
427 systematic review of clinical trials. *Rheumatology (Oxford).* 2012;51(8):1440-6. Epub  
428 2012/04/03. doi: 10.1093/rheumatology/kes043. PubMed PMID: 22467082.
- 429 16. Symonds T, Hughes B, Liao S, Ang Q, Bellamy N. Validation of the Chinese Western  
430 Ontario and McMaster Universities Osteoarthritis Index in Patients From Mainland China With  
431 Osteoarthritis of the Knee. *Arthritis Care Res (Hoboken).* 2015;67(11):1553-60. Epub  
432 2015/05/29. doi: 10.1002/acr.22631. PubMed PMID: 26018634.
- 433 17. Dagenais S, Garbedian S, Wai EK. Systematic review of the prevalence of radiographic  
434 primary hip osteoarthritis. *Clin Orthop Relat Res.* 2009;467(3):623-37. Epub 2008/11/28. doi:  
435 10.1007/s11999-008-0625-5. PubMed PMID: 19037710; PubMed Central PMCID:  
436 PMCPMC2635466.
- 437 18. Cooper C, Snow S, McAlindon TE, Kellingray S, Stuart B, Coggon D, et al. Risk factors for  
438 the incidence and progression of radiographic knee osteoarthritis. *Arthritis Rheum.*  
439 2000;43(5):995-1000. Epub 2000/05/19. doi: 10.1002/1529-0131(200005)43:5<995::Aid-  
440 anr6>3.0.Co;2-1. PubMed PMID: 10817551.
- 441 19. Chaisson CE, Zhang Y, McAlindon TE, Hannan MT, Aliabadi P, Naimark A, et al.  
442 Radiographic hand osteoarthritis: incidence, patterns, and influence of pre-existing disease in

443 a population based sample. J Rheumatol. 1997;24(7):1337-43. Epub 1997/07/01. PubMed  
444 PMID: 9228134.

445 20. Hochberg MC, Lethbridge-Cejku M, Scott WW, Jr., Reichle R, Plato CC, Tobin JD. The  
446 association of body weight, body fatness and body fat distribution with osteoarthritis of the knee:  
447 data from the Baltimore Longitudinal Study of Aging. J Rheumatol. 1995;22(3):488-93. Epub  
448 1995/03/01. PubMed PMID: 7783067.

449 21. Jinks C, Jordan KP, Blagojevic M, Croft P. Predictors of onset and progression of knee  
450 pain in adults living in the community. A prospective study. Rheumatology (Oxford).  
451 2008;47(3):368-74. Epub 2008/02/12. doi: 10.1093/rheumatology/kem374. PubMed PMID:  
452 18263594.

453 22. Jónsson H, Elíasson GJ, Jónsson A, Eiríksdóttir G, Sigurdsson S, Aspelund T, et al. High  
454 hand joint mobility is associated with radiological CMC1 osteoarthritis: the AGES-Reykjavik  
455 study. Osteoarthritis Cartilage. 2009;17(5):592-5. Epub 2008/11/18. doi:  
456 10.1016/j.joca.2008.10.002. PubMed PMID: 19010064; PubMed Central PMCID:  
457 PMCPMC2756801.

458 23. Jónsson H, Valtýsdóttir ST, Kjartansson O, Brekkan A. Hypermobility associated with  
459 osteoarthritis of the thumb base: a clinical and radiological subset of hand osteoarthritis. Ann  
460 Rheum Dis. 1996;55(8):540-3. Epub 1996/08/01. doi: 10.1136/ard.55.8.540. PubMed PMID:  
461 8774182; PubMed Central PMCID: PMCPMC1010234.

462 24. Toivanen AT, Heliövaara M, Impivaara O, Arokoski JP, Knekt P, Lauren H, et al. Obesity,  
463 physically demanding work and traumatic knee injury are major risk factors for knee  
464 osteoarthritis--a population-based study with a follow-up of 22 years. Rheumatology (Oxford).

- 465 2010;49(2):308-14. Epub 2009/12/01. doi: 10.1093/rheumatology/kep388. PubMed PMID:  
466 19946021.
- 467 25. Litwic A, Edwards MH, Dennison EM, Cooper C. Epidemiology and burden of osteoarthritis.  
468 Br Med Bull. 2013;105:185-99. Epub 2013/01/23. doi: 10.1093/bmb/lds038. PubMed PMID:  
469 23337796; PubMed Central PMCID: PMC3690438.
- 470 26. Harkey MS, Luc BA, Golightly YM, Thomas AC, Driban JB, Hackney AC, et al.  
471 Osteoarthritis-related biomarkers following anterior cruciate ligament injury and reconstruction:  
472 a systematic review. Osteoarthritis Cartilage. 2015;23(1):1-12. Epub 2014/09/16. doi:  
473 10.1016/j.joca.2014.09.004. PubMed PMID: 25219671.
- 474 27. Muthuri SG, McWilliams DF, Doherty M, Zhang W. History of knee injuries and knee  
475 osteoarthritis: a meta-analysis of observational studies. Osteoarthritis Cartilage.  
476 2011;19(11):1286-93. Epub 2011/09/03. doi: 10.1016/j.joca.2011.07.015. PubMed PMID:  
477 21884811.
- 478 28. Wilder FV, Hall BJ, Barrett JP, Jr., Lemrow NB. History of acute knee injury and  
479 osteoarthritis of the knee: a prospective epidemiological assessment. The Clearwater  
480 Osteoarthritis Study. Osteoarthritis Cartilage. 2002;10(8):611-6. Epub 2002/12/14. doi:  
481 10.1053/joca.2002.0795. PubMed PMID: 12479382.
- 482 29. O'Neill TW, McCabe PS, McBeth J. Update on the epidemiology, risk factors and disease  
483 outcomes of osteoarthritis. Best Pract Res Clin Rheumatol. 2018;32(2):312-26. Epub  
484 2018/12/12. doi: 10.1016/j.berh.2018.10.007. PubMed PMID: 30527434.
- 485 30. Valdes AM, Spector TD. Genetic epidemiology of hip and knee osteoarthritis. Nat Rev  
486 Rheumatol. 2011;7(1):23-32. Epub 2010/11/17. doi: 10.1038/nrrheum.2010.191. PubMed

487 PMID: 21079645.

488 31. Panoutsopoulou K, Zeggini E. Advances in osteoarthritis genetics. *J Med Genet.*

489 2013;50(11):715-24. Epub 2013/07/23. doi: 10.1136/jmedgenet-2013-101754. PubMed PMID:

490 23868913; PubMed Central PMCID: PMC3812881.

491 32. Weldingh E, Johnsen MB, Hagen KB, Østerås N, Risberg MA, Natvig B, et al. The Maternal

492 and Paternal Effects on Clinically and Surgically Defined Osteoarthritis. *Arthritis Rheumatol.*

493 2019;71(11):1844-8. Epub 2019/06/27. doi: 10.1002/art.41023. PubMed PMID: 31237417.

494 33. Watt FE, Wise EM. Osteoarthritis and associated comorbidities: new answers and more

495 questions. *Rheumatology.* 2021;60(9):3966-8. doi: 10.1093/rheumatology/keab405.

496 34. Chiou AF, Lin HY, Huang HY. Disability and pain management methods of Taiwanese

497 arthritic older patients. *J Clin Nurs.* 2009;18(15):2206-16. Epub 2009/07/09. doi:

498 10.1111/j.1365-2702.2008.02759.x. PubMed PMID: 19583652.

499 35. Roubion RC, Fox RS, Townsend LA, Pollock GR, Leonardi C, Dasa V. Does Marital Status

500 Impact Outcomes After Total Knee Arthroplasty? *J Arthroplasty.* 2016;31(11):2504-7. Epub

501 2016/10/19. doi: 10.1016/j.arth.2016.04.017. PubMed PMID: 27240961.

502 36. Coombs RH. Marital Status and Personal Well-Being: A Literature Review. *Family*

503 *Relations.* 1991;40:97-102.

504 37. Gove WR, Hughes M, Style CB. Does marriage have positive effects on the psychological

505 well-being of the individual? *J Health Soc Behav.* 1983;24(2):122-31. Epub 1983/06/01.

506 PubMed PMID: 6886367.

507 38. Stubbs B, Aluko Y, Myint PK, Smith TO. Prevalence of depressive symptoms and anxiety

508 in osteoarthritis: a systematic review and meta-analysis. *Age and Ageing.* 2016;45(2):228-35.

509 doi: 10.1093/ageing/afw001.

510 39. Gleicher Y, Croxford R, Hochman J, Hawker G. A prospective study of mental health care

511 for comorbid depressed mood in older adults with painful osteoarthritis. BMC Psychiatry.

512 2011;11:147. Epub 2011/09/14. doi: 10.1186/1471-244x-11-147. PubMed PMID: 21910895;

513 PubMed Central PMCID: PMC3184052.

514 40. Covic T, Tyson G, Spencer D, Howe G. Depression in rheumatoid arthritis patients:

515 demographic, clinical, and psychological predictors. J Psychosom Res. 2006;60(5):469-76.

516 Epub 2006/05/03. doi: 10.1016/j.jpsychores.2005.09.011. PubMed PMID: 16650587.

517



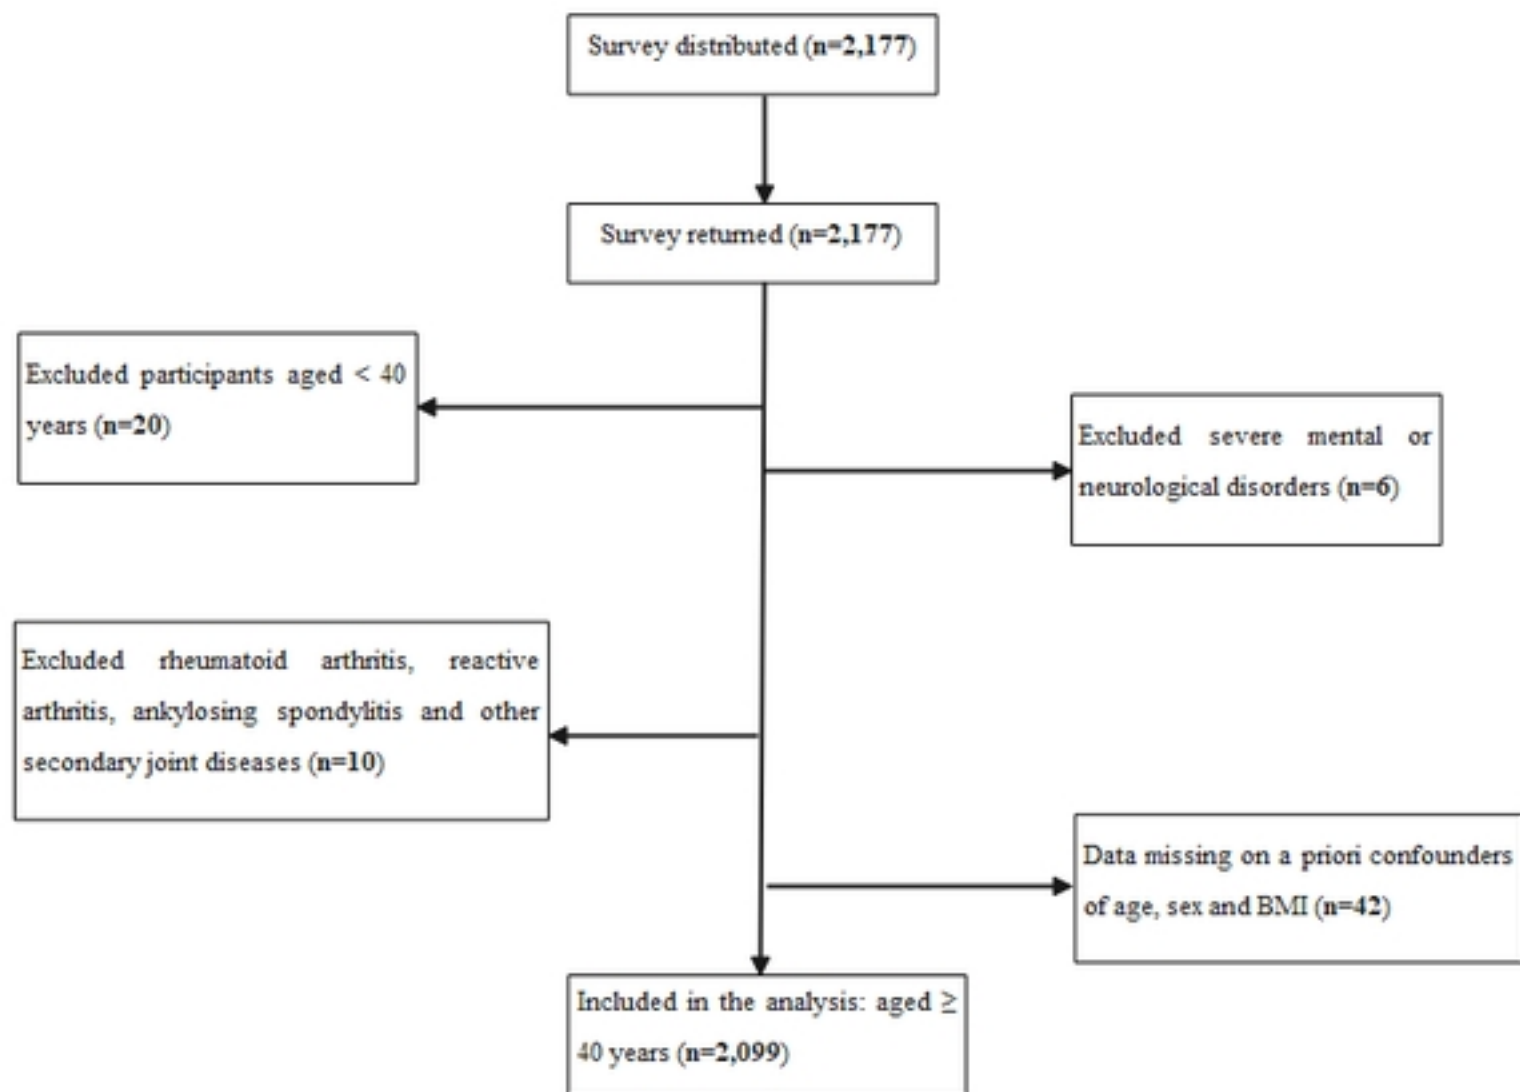

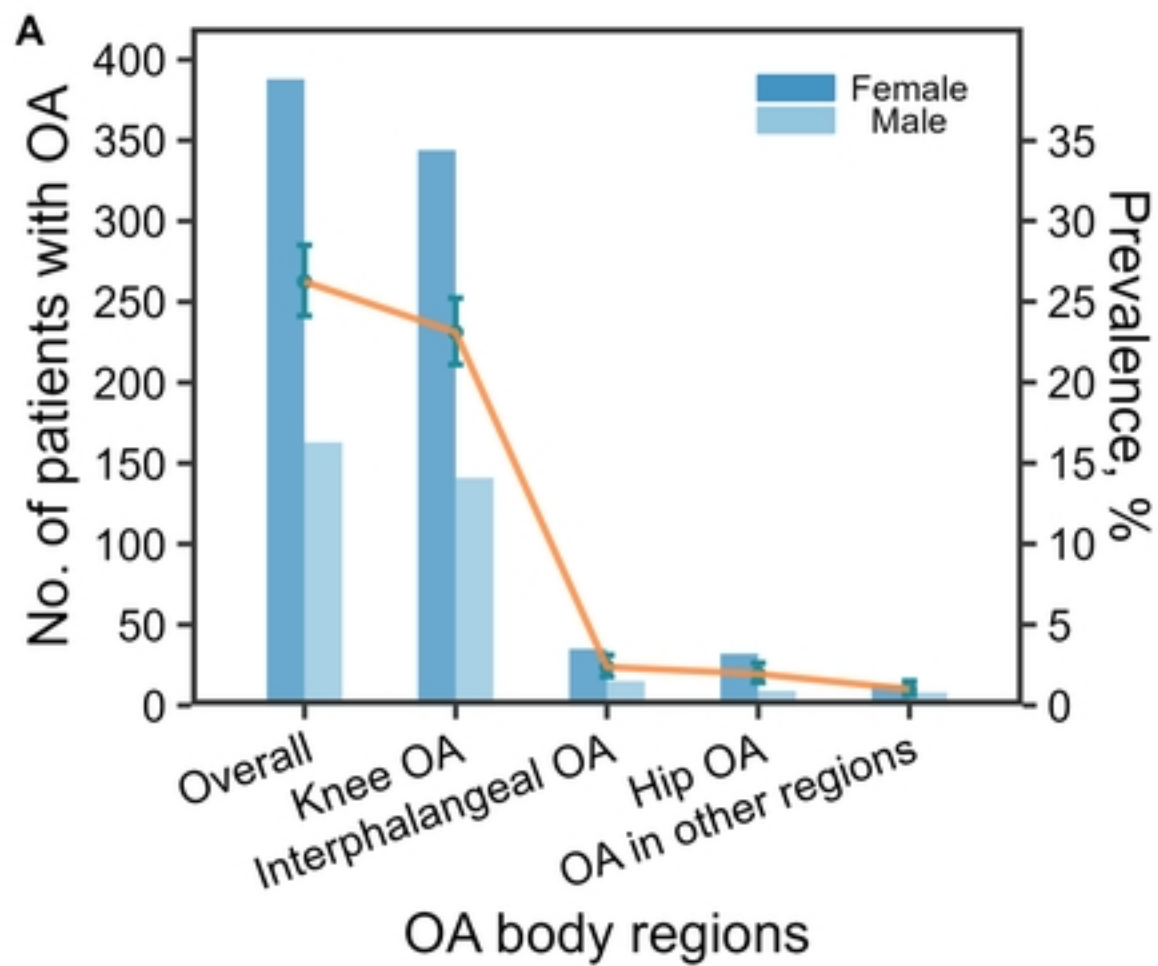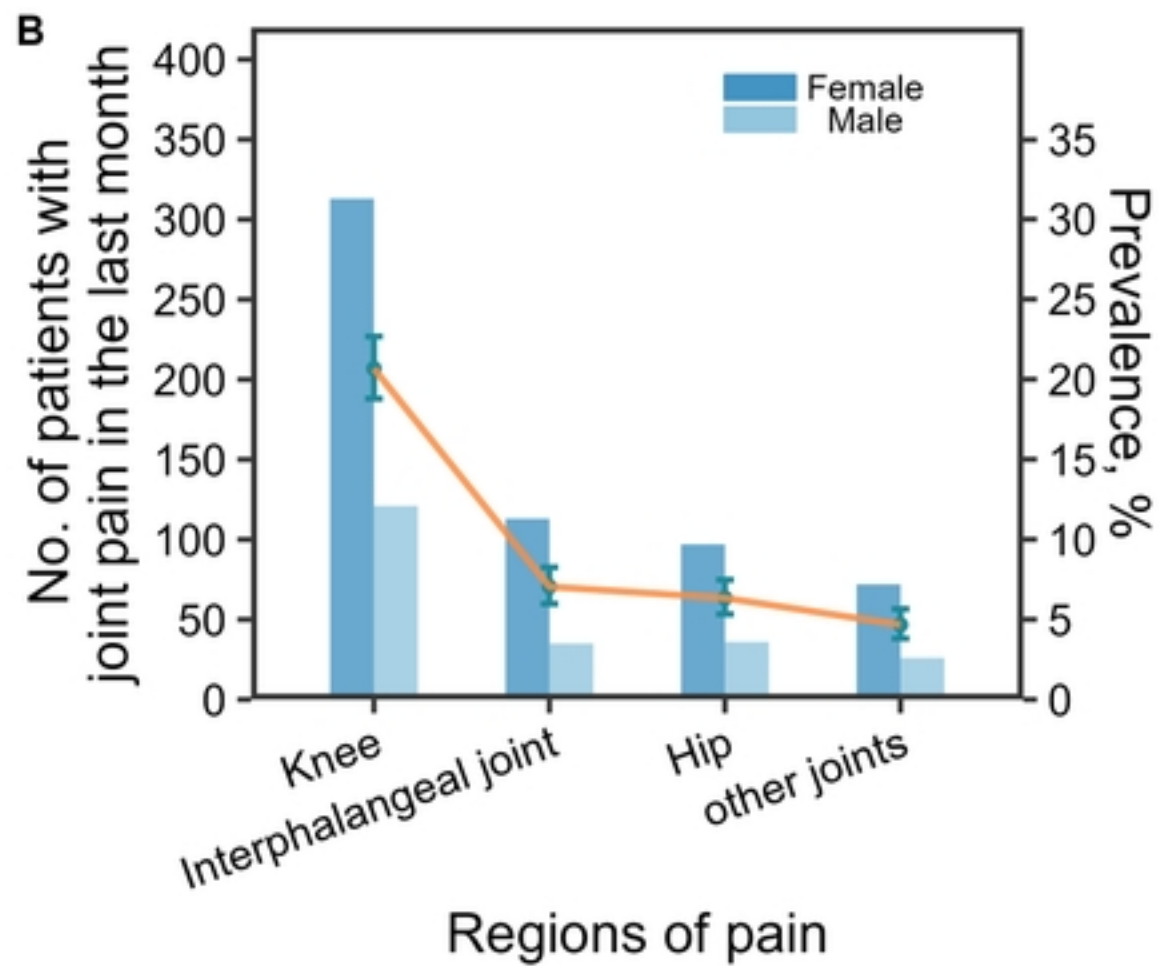

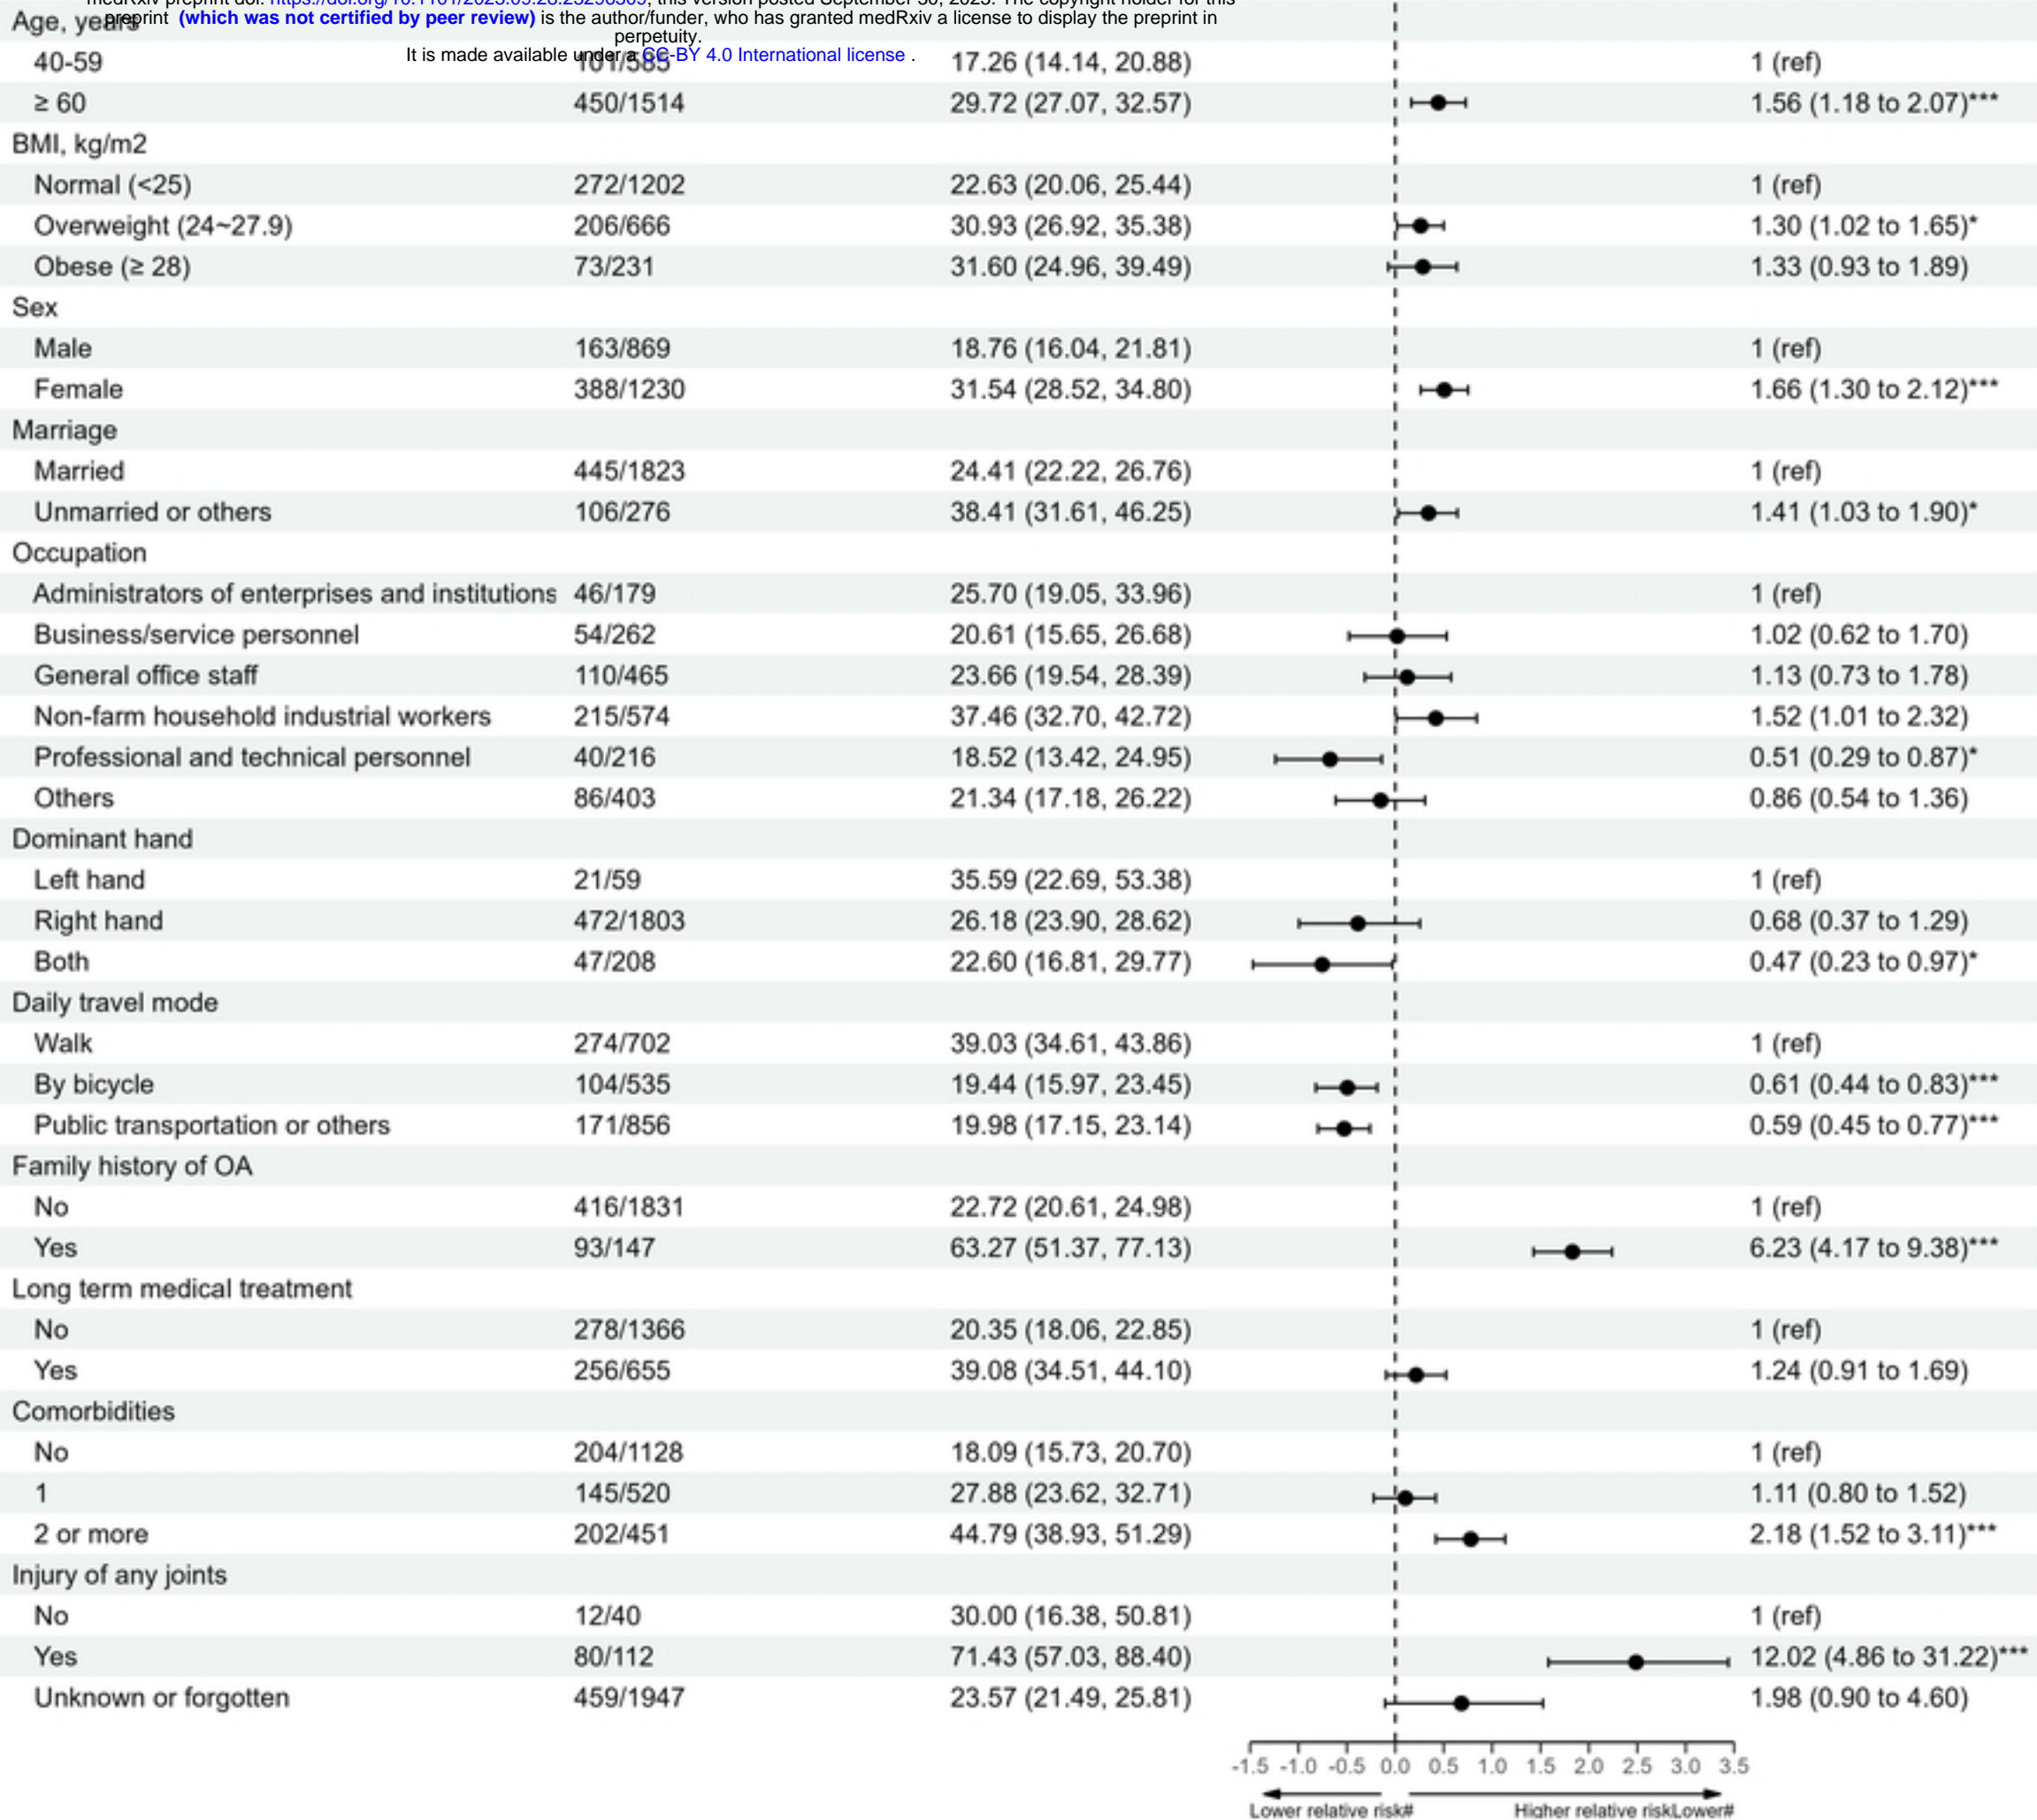

Source: https://medrxiv.org/content/10.1101/2023.09.28.23296309.full.pdf
